# Supplementary material for: Development of Machine Learning Models for Prediction of Osteoporosis from Clinical Health Examination Data
Source: MDPI journal article supplement (doi:10.3390/ijerph18147635), 2021-07-18
Supplement: s1 [file s1]

## Supplementary files

**Table S1.** Domain of the candidate features and the selected features.

|                      | Domain of features            | Considered feature           | Selected feature |
|----------------------|-------------------------------|------------------------------|------------------|
| History taking       | Personal history              | History of smoking           | V                |
|                      |                               | History of alcohol drinking  | V                |
|                      | Medical history               | History of Hypertension      |                  |
|                      |                               | History of Diabetes mellitus |                  |
|                      | OBGYN history<br>(for Female) | Gravidity                    |                  |
|                      |                               | Parity                       | V                |
| Menopause status     |                               | V                            |                  |
| History of HRT       |                               | V                            |                  |
| Physical examination | Physical characteristics      | Age                          | V                |
|                      |                               | Height                       | V                |
|                      |                               | Weight                       | V                |
|                      |                               | Body fat                     |                  |
|                      |                               | Waist circumference          | V                |
|                      |                               | Buttock circumference        |                  |
|                      | Vital signs                   | Systolic blood pressure      |                  |
|                      |                               | Diastolic blood pressure     |                  |
| Pulse rate           |                               |                              |                  |
| Laboratory test      | Hematological profile         | White blood count            |                  |
|                      |                               | Hemoglobin                   | V                |
|                      |                               | Platelet                     |                  |
|                      | Renal function                | Blood urea nitrogen          |                  |
|                      |                               | Creatinine                   | V                |
|                      | Electrolytes                  | Sodium                       |                  |
|                      |                               | Potassium                    |                  |
|                      |                               | Calcium                      |                  |
|                      |                               | Phosphate                    |                  |
|                      | Liver function                | Total bilirubin              |                  |
|                      |                               | Alanine transaminase         | V                |
|                      |                               | Aspartate aminotransferase   |                  |
| Alkaline phosphatase |                               | V                            |                  |
| Thyroid function     | Thyroid-stimulating hormone   | V                            |                  |
|                      | Free thyroxine                |                              |                  |
| Lipid profile        | Total cholesterol             |                              |                  |
|                      | Triglyceride                  | V                            |                  |
|                      | HDL-C                         | V                            |                  |
|                      | LDL-C                         |                              |                  |
| Protein content      | Total protein                 |                              |                  |
|                      | Albumin                       | V                            |                  |

|                    |                               |                                                           |        |
|--------------------|-------------------------------|-----------------------------------------------------------|--------|
|                    | Markers for diabetes mellitus | Fasting glucose<br>Postprandial glucose<br>Hemoglobin A1c |        |
| Integrated results |                               | Hypertension<br>Diabetes mellitus                         | V<br>V |

OBGYN: obstetrics and gynecology; HRT: hormone-replacement therapy; HDL-C: high-density lipoprotein cholesterol; LDL-C: low-density lipoprotein cholesterol.

**Table S2.** Performance of the full models and the smaller models with 6 variables for prediction of osteoporosis in men and women.

|       | AUROC of full models (95% CI) | AUROC of models with 6 variables (95% CI) | p-value* |
|-------|-------------------------------|-------------------------------------------|----------|
| Men   |                               |                                           |          |
| ANN   | 0.837 (0.805-0.865)           | 0.779 (0.744-0.812)                       | 0.0682   |
| SVM   | 0.840 (0.809-0.868)           | 0.812 (0.779-0.842)                       | 0.2526   |
| RF    | 0.843 (0.812-0.871)           | 0.812 (0.779-0.843)                       | 0.2725   |
| KNN   | 0.821 (0.788-0.851)           | 0.775 (0.740-0.807)                       | 0.1388   |
| LoR   | 0.827 (0.794-0.856)           | 0.782 (0.747-0.814)                       | 0.0153   |
| Women |                               |                                           |          |
| ANN   | 0.781 (0.745-0.814)           | 0.762 (0.726-0.796)                       | 0.1704   |
| SVM   | 0.807 (0.773-0.838)           | 0.783 (0.747-0.816)                       | 0.3643   |
| RF    | 0.811 (0.777-0.842)           | 0.785 (0.749-0.817)                       | 0.1778   |
| KNN   | 0.767 (0.731-0.801)           | 0.774 (0.738-0.807)                       | 0.8242   |
| LoR   | 0.772 (0.732-0.806)           | 0.761 (0.724-0.795)                       | 0.4470   |

\*P-values were calculated with the nonparametric methods to compare two ROC curves proposed by DeLong et al.

ANN: Artificial neural network; SVM: Support vector machine; RF: Random forest; KNN: K-nearest neighbors; LoR: Logistic regression; AUROC: Area under the receiver operating characteristic curve; CI: Confidence interval; ROC curve: receiver operating characteristic curve.
